# Supplementary material for: Differential outcome of an antimicrobial stewardship audit and feedback program in two intensive care units: a controlled interrupted time series study
Source: PubMed Central journal article supplement (PMC4625716; doi:10.1186/s12879-015-1223-2), 2015-10-29
Supplement: 12879_2015_1223_MOESM1_ESM.pdf [file 12879_2015_1223_MOESM1_ESM.pdf]

## **Antimicrobials Included in Overall Antimicrobial Use and Cost**

### Systemic Antibacterials

amikacin  
ampicillin  
amoxicillin  
amoxicillin-clavulanate  
atovaquone  
azithromycin  
aztreonam  
cefaclor  
cefadroxil  
cefazolin  
cefepime  
cefixime  
cefmetazole  
cefotaxime  
cefoxitin  
cefprozil  
ceftriaxone  
ceftazidime  
cefuroxime  
cephalexin  
ciprofloxacin  
chloramphenicol  
clarithromycin  
clindamycin  
cloxacillin  
colistimethate sodium  
daptomycin  
dapson  
doripenem  
doxycycline  
ertapenem  
erythromycin  
fosfomicin  
gentamicin  
imipenem-cilastatin  
levofloxacin  
linezolid  
meropenem  
metronidazole  
minocycline  
moxifloxacin  
nitrofurantoin

norfloxacin  
ofloxacin  
penicillin G (exception: exclude penicillin  
G benzathine)  
penicillin V  
piperacillin  
piperacillin-tazobactam  
quinupristin-dalfopristin  
rifabutin  
rifampin  
sodium fusidate  
sulfamethoxazole-trimethoprim  
ticarcillin-clavulanate  
tigecycline  
trimethoprim  
tobramycin  
vancomycin

#### Systemic Antifungals

amphotericin B  
anidulafungin  
caspofungin  
fluconazole  
flucytosine  
itraconazole  
ketoconazole  
micafungin  
nystatin (oral use)  
posaconazole  
terbinafine  
voriconazole

#### Systemic Antivirals

oseltamivir  
zanamivir
